# Supplementary material
Source: ML conference proceedings conference paper supplement (https://openreview.net/forum?id=PK2debCKaG)
Supplement: supplementary_material [file attachment]

# Language Conditioned Traffic Generation

## Supplementary Material

Anonymous Author(s)

Affiliation

Address

email

### A Interpreter

#### A.1 Structured Representation Details

The map specific  $z^m$  is a 6-dim integer vector. Its first four dimensions denote the number of lanes in each direction (set as north for the ego vehicle). The fifth dimension represents the discretized distance in 5-meter intervals from the map center to the nearest intersection (0-5, 5-10...). The sixth dimension indicates the ego vehicle's lane id, starting from 1 for the rightmost lane.

For agent  $i$ , the agent-specific  $z_i^a$  is an 8-dim integer vector describing this agent relative to the ego vehicle. The first dimension denotes the quadrant index (1-4), where quadrant 1 represents the front-right of the ego vehicle. The second dimension is the discretized distance to the ego vehicle with a 20m interval, and the third denotes orientation (north, south, east, west). The fourth dimension indicates discretized speed, set in 2.5m/s intervals. The last four dimensions describe actions over the next four seconds (one per second) chosen from a discretized set of seven possible actions: lane changes (left/right), turns (left/right), moving forward, accelerating, decelerating, and stopping.

#### A.2 Generation prompts

The scenario generation prompt used for Interpreter consists of several sections:

1. **Task description:** simple description of task of scenario generation and output formats.
2. **Chain-of-thought prompting [1]:** For example, "summarize the scenario in short sentences", "explain for each group of vehicles why they are put into the scenario".
3. **Description of structured representation:** detailed description for each dimension of the structured representation. We separately inform the model Map and Actor formats.
4. **Guidelines:** several generation instructions. For example, "Focus on realistic action generation of the motion to reconstruct the query scenario".
5. **Few-shot examples:** A few input-output examples. We provide a Crash Report example.

We show the full prompt below:

Prompt 1: Full prompt for Interpreter scenario generation.

You are a very faithful format converter that translate natural language traffic scenario descriptions to a fix-form format to appropriately describe the scenario with motion action. You also need to output an appropriate map description that is able to support this scenario. Your ultimate goal is to generate realistic traffic scenarios that faithfully represents natural language descriptions normal scenes that follows the traffic rule.

Answer with a list of vectors describing the attributes of each of the vehicles in the scenario.

Desired format:

37 Summary: summarize the scenario in short sentences, including the number of vehicles. Also  
38 explain the underlying map description.

39 Explanation: explain for each group of vehicles why they are put into the scenario and how  
40 they fulfill the requirement in the description.

41 Actor Vector: A list of vectors describing the attributes of each of the vehicles in the  
42 scenario, only output the values without any text:

43 - 'V1': [,,,,,,]  
44 - 'V2': [,,,,,,]  
45 - 'V3': [,,,,,,]

46 Map Vector: A vector describing the map attributes, only output the values without any text:  
47 - 'Map': [,,,,,]  
48

49 Meaning of the Actor vector attribute:

50 - dim 0: 'pos': [-1,3] - whether the vehicle is in the four quadrant of ego vehicle in the  
51 order of [0 - 'front left', 1 - 'back left', 2- 'back right', 3 - 'front right']. -1 if  
52 the vehicle is the ego vehicle.

53 - dim 1: 'distance': [0,3] - the distance range index of the vehicle towards the ego vehicle  
54 ; range is from 0 to 72 meters with 20 meters interval. 0 if the vehicle is the ego  
55 vehicle. For example, if distance value is 15 meters, then the distance range index is  
56 0.

57 - dim 2: 'direction': [0,3] - the direction of the vehicle relative to the ego vehicle, in  
58 the order of [0- 'parallel\_same', 1-'parallel\_opposite', 2-'perpendicular\_up', 3-'  
59 perpendicular\_down']. 0 if the vehicle is the ego vehicle.

60 - dim 3: 'speed': [0,20] - the speed range index of the vehicle; range is from 0 to 20 m/s  
61 with 2.5 m/s interval. For example, 20m/s is in range 8, therefore the speed value is  
62 8.

63 - dim 4-7: 'action': [0,7] - 4-dim, generate actions into the future 4 second with each two  
64 actions have a time interval of 1s (4 actions in total), the action ids are [0 - 'stop  
65 ', 1 - 'turn left', 2 - 'left lane change', 3- 'decelerate', 4- 'keep\_speed', 5-'  
66 accelerate', 6-'right lane change', 7-'turn right'].

67

68 Meaning of the Map attributes:

69 - dim 0-1: 'parallel\_lane\_cnt': 2-dim. The first dim is the number of parallel same-  
70 direction lanes of the ego lane, and the second dim is the number of parallel opposite-  
71 direction lanes of the ego lane.

72 - dim 2-3: 'perpendicular\_lane\_cnt': 2-dim. The first dim is the number of perpendicular  
73 upstream-direction lanes, and the second dim is the number of perpendicular downstream-  
74 direction lanes.

75 - dim 4: 'dist\_to\_intersection': 1-dim. the distance range index of the ego vehicle to the  
76 intersection center in the x direction, range is from 0 to 72 meters with 5 meters  
77 interval. -1 if there is no intersection in the scenario.

78 - dim 5: 'lane id': 1-dim. the lane id of the ego vehicle, counting from the rightmost lane  
79 of the same-direction lanes, starting from 1. For example, if the ego vehicle is in the  
80 rightmost lane, then the lane id is 1; if the ego vehicle is in the leftmost lane,  
81 then the lane id is the number of the same-direction lanes.

82

83 Transform the query sentence to the Actor Vector strictly following the rules below:

84 - Focus on realistic action generation of the motion to reconstruct the query scenario.

85 - Follow traffic rules to form a fundamental principle in most road traffic systems to  
86 ensure safety and smooth operation of traffic. You should incorporate this rule into  
87 the behavior of our virtual agents (vehicles).

88 - Traffic rule: in an intersection, when the vehicles on one side of the intersection are  
89 crossing, the vehicles on the other side of the intersection should be waiting. For  
90 example, if V1 is crossing the intersection and V2 is on the perpendicular lane, then  
91 V2 should be waiting.

92 - For speed and distance, convert the unit to m/s and meter, and then find the interval  
93 index in the given range.

94 - Make sure the position and direction of the generated vehicles are correct.

95 - Describe the initialization status of the scenario.

96 - During generation, the number of the vehicles is within the range of [1, 32].

97 - Always generate the ego vehicle first (V1).

98 - Always assume the ego car is in the center of the scene and is driving in the positive x  
99 direction.

100 - In the input descriptions, regard V1, Vehicle 1 or Unit #1 as the ego vehicle. All the  
101 other vehicles are the surrounding vehicles. For example, for "Vehicle 1 was traveling  
102 southbound", the ego car is Vehicle 1.

103 - If the vehicle is stopping, its speed should be 0m/s (index 0). Also, if the first action  
104 is 'stop', then the speed should be 0m/s (index 0).

105 - Focus on the interactions between the vehicles in the scenario.

106 - Regard the last time stamp as the time stamp of 5 second into the future.

107

108 Generate the Map Vector following the rules below:

```

109 - If there is vehicle turning left or right, there must be an intersection ahead.
110 - Should at least have one lane with the same-direction as the ego lane; i.e., the first dim
111   of Map should be at least 1. For example, if this is a one way two lane road, then the
112   first dim of Map should be 2.
113 - Regard the lane at the center of the scene as the ego lane.
114 - Consider the ego car's direction as the positive x direction. For example, for "V1 was
115   traveling northbound in lane five of a five lane controlled access roadway", there
116   should be 5 lanes in the same direction as the ego lane.
117 - The generated map should strictly follow the map descriptions in the query text. For
118   example, for "Vehicle 1 was traveling southbound", the ego car should be in the
119   southbound lane.
120 - If there is an intersection, there should be at least one lane in either the upstream or
121   downstream direction.
122 - If there is no intersection, the distance to the intersection should be -1.
123 - There should be vehicle driving vertical to the ego vehicle in the scene only when there
124   is an intersection in the scene. For example, when the road is just two-way, there
125   should not be any vehicle driving vertical to the ego vehicle.
126 - If no intersection is mentioned, generate intersection scenario randomly with real-world
127   statistics.
128
129
130 Query: The crash occurred during daylight hours on a dry, bituminous, two-lane roadway under
131   clear skies. There was one northbound travel lane and one southbound travel lane with
132   speed limit of 40 km/h (25 mph). The northbound lane had a -3.6 percent grade and
133   the southbound lane had a +3.6 percent grade. Both travel lanes were divided by a
134   double yellow line. A 2016 Mazda CX-3 (V1) was in a parking lot attempting to execute a
135   left turn to travel south. A 2011 Dodge Charger (V2/police car) was traveling north
136   responding to an emergency call with lights sirens activated. V1 was in a parking lot (
137   facing west) and attempted to enter the roadway intending to turn left. As V1 entered
138   the roadway it was impacted on the left side by the front of V2 (Event 1). V1 then
139   rotated counterclockwise and traveled off the west road edge and impacted an embankment
140   with its front left bumper (Event 2). After initial impact V2 continued on in a
141   northern direction and traveling to final rest approximately 40 meters north of impact
142   area facing north in the middle of the roadway. V1 and V2 were towed from the scene
143   due to damage.
144
145 Summary: V1 attempts to turn left from a parking lot onto a two-lane roadway and is struck
146   by V2, a police car traveling north with lights and sirens activated. There are 2
147   vehicles in this scenario. This happens on a parking lot to a two-lane two-way road
148   with intersection.
149 Explanation:
150 - V1 (ego vehicle) is attempting to turn left from a parking lot onto the roadway. We cannot
151   find V1's speed in the query. Because V1 tries to turn left, its initial speed should
152   be set low. We set V1's speed as 5 m/s, which has the index of 2. V1 turns left, so its
153   actions are all 1 (turn left).
154 - V2 is a police car traveling north with lights and sirens activated. As V1 is turning left
155   , 5 seconds before the crash, V1 is facing west and V2 is coming from northbound,
156   crossing the path of V1. In the coordinates of V1 (which is facing west initially), V2
157   comes from the front and is on the left side. Hence, V2's position is "front left" (3).
158   As V1 is facing west and V2 facing north, V2 is moving in the perpendicular down
159   direction with V1. Therefore its direction is 3 (perpendicular_down). We cannot find V2
160   's speed in the query. Because V2 is a police car responding to an emergency call, we
161   assume V2's init speed is 10 m/s (index 4). Given this speed, V2's distance to V1 is 10
162   m/s * 5s = 50m (index 10). V2 keeps going straight, so its actions are all 4 (keep
163   speed).
164 - Map: V1 tries to turn left from a parking lot onto a two-lane roadway. There are a one-
165   way exit lane from parking lot (one same-direction parallel) and the ego vehicle is in
166   the left turn lane with lane id 1. On the perpendicular side there is a two-lane
167   roadway. V1 is about to turn left, so the distance to the intersection is set to be 10m
168   (index 2).
169 Actor Vector:
170 - 'V1': [-1, 0, 0, 2, 1, 1, 1, 1]
171 - 'V2': [0, 10, 3, 4, 4, 4, 4, 4]
172 Map Vector:
173 - 'Map': [1, 0, 1, 1, 2, 1]
174
175 Query: INSERT_QUERY_HERE
176
177 Output:

```

### A.3 Instructional editing prompts

We also provide Interpreter another prompt for instructional scenario editing. This prompt follow a similar structure to the generation prompt. We mainly adopt the task description, guidelines, and examples to scenario editing tasks. Note that for the instructional editing task, we change the distance interval (second dimension) of agent-specific  $z_i^a$  from 20 meters to 5 meters. This is to ensure the unedited agents stay in the same region before and after editing.

We show the full prompt below:

#### Prompt 2: Full prompt for Interpreter instructional scenario editing.

```
You are a traffic scenario editor that edit fix-form traffic scenario descriptions according
to the user's natural language instructions.

The user will input a fix-form traffic scenario description as well as the map description.
The user also a natural language instruction to modify the scenario. You need to output
a fix-form traffic scenario that is modified according to the instruction.

Input format:
- V1: [,,,,,,]
- V2: [,,,,,,]
- V3: [,,,,,,]
- Map: [,,,,]
Instruction: natural language instruction to modify the scenario.

Output format:
Summary: summarize the scenario in short sentences. summarize the user instruction, and
indicate which part of the scenario should be modified.
Explanation: explain step-by-step how each part of the scenario is modified.
Actor Vector: A list of vectors describing the attributes of each of the vehicles. Only the
vehicles that are modified should be included in the output.
- V2: [,,,,,,]

Meaning of the Actor vector attribute:
- dim 0: 'pos': [-1,3] - whether the vehicle is in the four quadrant of ego vehicle in the
order of [0 - 'front left', 1 - 'back left', 2- 'back right', 3 - 'front right']. -1 if
the vehicle is the ego vehicle.
- dim 1: 'distance': [0,14] - the distance range index of the vehicle towards the ego
vehicle; range is from 0 to 72 meters with 5 meters interval. 0 if the vehicle is the
ego vehicle.
- dim 2: 'direction': [0,3] - the direction of the vehicle relative to the ego vehicle, in
the order of [0- 'parallel_same', 1-'parallel_opposite', 2-'perpendicular_up', 3-'
perpendicular_down']. 0 if the vehicle is the ego vehicle.
- dim 3: 'speed': [0,8] - the speed range index of the vehicle; range is from 0 to 20 m/s
with 2.5 m/s interval. For example, 20m/s is in range 8, therefore the speed value is
8.
- dim 4-7: 'action': [0,7] - 4-dim, generate actions into the future 4 second with each two
actions have a time interval of 1s (4 actions in total), the action ids are [0 - 'stop
', 1 - 'turn left', 2 - 'left lane change', 3- 'decelerate', 4- 'keep_speed', 5- '
accelerate', 6-'right lane change', 7-'turn right'].

Meaning of the Map attributes:
- dim 0-1: 'parallel_lane_cnt': 2-dim. The first dim is the number of parallel same-
direction lanes of the ego lane, and the second dim is the number of parallel opposite-
direction lanes of the ego lane.
- dim 2-3: 'perpendicular_lane_cnt': 2-dim. The first dim is the number of perpendicular
upstream-direction lanes, and the second dim is the number of perpendicular downstream-
direction lanes.
- dim 4: 'dist_to_intersection': 1-dim. the distance range index of the ego vehicle to the
intersection center in the x direction, range is from 0 to 72 meters with 5 meters
interval. -1 if there is no intersection in the scenario.
- dim 5: 'lane id': 1-dim. the lane id of the ego vehicle, counting from the rightmost lane
of the same-direction lanes, starting from 1. For example, if the ego vehicle is in the
rightmost lane, then the lane id is 1; if the ego vehicle is in the leftmost lane,
then the lane id is the number of the same-direction lanes.

Follow the instructions below:
- 'V1' is the ego vehicle, and the other vehicles are the surrounding vehicles.
```

```

244 - The user will input a fix-form traffic scenario description as well as the map description
245 . The user also an natural language instruction to modify the scenario. You need to
246 output a fix-form traffic scenario that is modified according to the instruction.
247 - First figure out which part of the scenario should be modified according to the
248 instruction. For example, if the instruction is "the vehicle in front of me should turn
249 left", then the vehicle in front of the ego vehicle should be modified.
250
251 Input:
252 Actor vector:
253 - V1: [-1, 0, 0, 0, 4, 4, 4, 4]
254 - V2: [ 2, 1, 0, 1, 4, 4, 4, 4]
255 - V3: [ 3, 3, 0, 1, 4, 4, 4, 0]
256 - V4: [ 3, 4, 0, 8, 4, 4, 2, 0]
257 - V5: [ 0, 9, 1, 8, -1, 4, 5, -1]
258 - V6: [ 3, 5, 0, 0, 0, 0, 0, 0]
259 - V7: [ 0, 9, 3, 0, 0, 0, 0, 0]
260 - V8: [ 3, 10, 3, 3, 4, 5, 1, 0]
261 - V9: [ 0, 10, 3, 0, 0, 0, 0, -1]
262 - V10: [ 3, 10, 2, 0, 0, 0, 0, -1]
263 - V11: [ 3, 11, 2, 0, 0, 0, 0, 0]
264 - V12: [ 3, 11, 2, 0, 0, 7, 0, 0]
265 - Map: [4, 3, 2, 3, 6, 4]
266
267 Instruction: move the vehicle behind the ego vehicle to the opposite lane and move faster.
268
269 Output:
270 Summary: The instruction is to move the vehicle behind the ego vehicle to the opposite lane
271 and accelerate. First find which vehicle is behind the ego vehicle. There are only 1
272 vehicle behind the ego vehicle, that is V2 (with position=2, indicating on the right
273 back side of the ego vehicle). Therefore, the vehicle V2 should be modified.
274 Explanation: The vehicle V2 is modified to move to the opposite lane and accelerate. The
275 vehicle V2 is in the right back side of the ego vehicle, and the ego vehicle is in the
276 rightmost lane of the same-direction lanes. Therefore, the vehicle V2 should move to
277 the leftmost lane of the opposite-direction lanes. Therefore, V2's direction should be
278 opposite to the ego vehicle, changed to 1 (parallel_opposite). In this lane, V2 should
279 be moved to the left back of the ego car, its position should be changed to 1. V2
280 should move faster, its speed should be changed to 10 (25 m/s).
281 Actor vector:
282 - V2: [ 1, 1, 1, 10, 4, 4, 4, 4]
283
284 Instruction: remove all the vehicles on the front of the ego car and moving in the same
285 direction.
286
287 Output:
288 Summary: The instruction is to remove all the vehicles on the front of the ego car and
289 moving in the same direction. First find which vehicles are on the front of the ego
290 vehicle. V3-V12 are all on the front of the ego vehicle. Then, only V3, V4 and V6 has
291 the same direction as the ego vehicle (0). Therefore, V3, V4 and V6 should be removed.
292 Explanation: V3, V4, V6 are on the front of the ego vehicle and moving in the same
293 direction. V3, V4 and V6 are removed from the scenario.
294
295 Actor vector:
296 - V3: removed.
297 - V4: removed.
298 - V6: removed.
299
300 Input: INSERT_QUERY_HERE
301
302 Output:
303

```

## 304 B Generator

### 305 B.1 Training objectives

306 In the main paper, we show the full training objective of Generator as:

$$\mathcal{L}(p, \tau) = \mathcal{L}_{\text{position}}(p, \tau) + \mathcal{L}_{\text{attr}}(p, \tau) + \mathcal{L}_{\text{motion}}(p, \tau). \quad (1)$$

307 In this section, we provide details of each loss function. We first pair each agent  $\hat{a}_i$  in  $p$  with a  
 308 ground-truth agent  $a_i$  in  $\tau$  based on the sequential ordering of the structured agent representation  
 309  $z^a$ . Assume there are in total  $N$  agents in the scenario.

310 For  $\mathcal{L}_{\text{position}}$ , we use cross-entropy loss between the per-lane categorical output  $\hat{p}$  and the ground-  
 311 truth lane segment id  $l$ . Specifically, we compute it as

$$\mathcal{L}_{\text{position}}(p, \tau) = \sum_{i=1}^N -\log \hat{p}_i(l_i), \quad (2)$$

312 where  $l_i$  is the index of the lane segment that the  $i$ -th ground-truth agent  $a_i$  is on.

313 For  $\mathcal{L}_{\text{attr}}$ , we use a negative log-likelihood loss, computed using the predicted GMM on the ground-  
 314 truth attribute values. Recall that for each attribute of agent  $i$ , we use an MLP to predict the param-  
 315 eters of a GMM model  $[\mu_i, \Sigma_i, \pi_i]$ . Here, we use these parameters to construct a GMM model and  
 316 compute the likelihood of ground-truth attribute values. Specifically, we have

$$\begin{aligned} \mathcal{L}_{\text{attr}}(p, \tau) = \sum_{i=1}^N & (-\log \text{GMM}_{\text{heading},i}(h_i) - \log \text{GMM}_{\text{vel},i}(vel_i) \\ & - \log \text{GMM}_{\text{size},i}(bbox_i) - \log \text{GMM}_{\text{pos},i}(pos_i)), \end{aligned} \quad (3)$$

317 where  $\text{GMM}_{\text{heading},i}$ ,  $\text{GMM}_{\text{vel},i}$ ,  $\text{GMM}_{\text{size},i}$ ,  $\text{GMM}_{\text{pos},i}$  represent the likelihood function of the pre-  
 318 dicted GMM models of agent  $i$ 's heading, velocity, size and position shift. These likelihood values  
 319 are computed using the predicted GMM parameters. Meanwhile,  $h_i$ ,  $vel_i$ ,  $bbox_i$  and  $pos_i$  represent  
 320 the heading, velocity, size and position shift of the ground-truth agent  $a_i$  respectively.

321 For  $\mathcal{L}_{\text{motion}}$ , we use MSE loss for the predicted trajectory closest to the ground-truth trajectory fol-  
 322 lowing the multi-path motion prediction idea [2]. Recall that for each agent  $\hat{a}_i$ , we predict  $K'$   
 323 different future trajectories and their probabilities as  $\{\text{pos}_{i,k}^{2:T}, \text{prob}_{i,k}\}_{k=1}^{K'} = \text{MLP}(q_i^*)$ . For each  
 324 timestamp  $t$ ,  $\text{pos}_{i,k}^t$  contains the agent's position and heading. We assume the trajectory of ground-  
 325 truth agent  $a_i$  is  $\text{pos}_i^{*2:T}$ . We can compute the index  $k^*$  of the closest trajectory from the  $K'$  pre-  
 326 dictions as  $k^* = \arg \min_k \sum_{t=2}^T (\text{pos}_{i,k}^t - \text{pos}_i^{*t})^2$ . Then, we compute the motion loss for agent  $i$   
 327 as:

$$\mathcal{L}_{\text{motion},i} = -\log \text{prob}_{i,k^*} + \sum_{t=2}^T (\text{pos}_{i,k^*}^t - \text{pos}_i^{*t})^2, \quad (4)$$

328 where we encourage the model to have a higher probability for the closest trajectory  $k^*$  and reduce  
 329 the distance between this trajectory with the ground truth. The full motion loss is simply:

$$\mathcal{L}_{\text{motion}}(p, \tau) = \sum_i^N \mathcal{L}_{\text{motion},i} \quad (5)$$

330 where we sum over all the motion losses for each predicted agent in  $p$ .

## 331 C Experiment Details

### 332 C.1 Baseline implementation

333 **TrafficGen [3].** We use the official implementation<sup>1</sup>. For a fair comparison, we train its Initial-  
 334 ization and Trajectory Generation modules on our dataset for 100 epochs with batch size 64. We  
 335 modify  $T = 50$  in the Trajectory Generation to align with our setting. We use the default values for  
 336 all the other hyper-parameters. During inference, we enforce TrafficGen to generate  $N$  vehicles by  
 337 using the result of the first  $N$  autoregressive steps of the Initialization module.

<sup>1</sup><https://github.com/metadriverse/trafficgen>

338 **MotionCLIP [4].** The core idea of MotionCLIP is to learn a shared space for the interested modal-  
 339 ity embedding (traffic scenario in our case) and text embedding. Formally, this model contains  
 340 a scenario encoder  $E$ , a text encoder  $\hat{E}$ , and a scenario decoder  $D$ . For each example of scene-  
 341 text paired data  $(\tau, L, m)$ , we encode scenario and text separately with their encoders  $\mathbf{z} = E(\tau)$ ,  
 342  $\hat{\mathbf{z}} = \hat{E}(L)$ . Then, the decoder takes  $\mathbf{z}$  and  $m$  and output a scenario  $p = D(\mathbf{z}, m)$ . MotionCLIP  
 343 trains the network with  $\mathcal{L}_{\text{rec}}$  to reconstruct the scenario from the latent code:

$$\mathcal{L}_{\text{rec}} = \mathcal{L}_{\text{position}}(p, \tau) + \mathcal{L}_{\text{attr}}(p, \tau) + \mathcal{L}_{\text{motion}}(p, \tau), \quad (6)$$

344 where we use the same set of loss functions as ours (Equation 1). On the other hand, MotionCLIP  
 345 aligns the embedding space of the scenario and text with:

$$\mathcal{L}_{\text{align}} = 1 - \cos(\mathbf{z}, \hat{\mathbf{z}}), \quad (7)$$

346 which encourages the alignment of scenario embedding  $\mathbf{z}$  and text embedding  $\hat{\mathbf{z}}$ . The final loss  
 347 function is therefore

$$\mathcal{L} = \mathcal{L}_{\text{rec}} + \lambda \mathcal{L}_{\text{align}}, \quad (8)$$

348 where we set  $\lambda = 100$ .

349 During inference, given an input text  $L$  and a map  $m$ , we can directly use the text encoder to obtain  
 350 latent code and decode a scenario from it, formally  $\tau = D(\hat{E}(L), m)$ .

351 For the scenario encoder  $E$ , we use the same scenario encoder as in [3], which is a 5-layer *multi-*  
 352 *context gating* (MCG) block [2] to encode the scene input  $\tau$  and outputs  $\mathbf{z} \in \mathbb{R}^{1024}$  with the context  
 353 vector output  $c$  of the final MCG block. For text encoder  $\hat{E}$ , we use the sentence embedding of  
 354 the fixed GPT-2 model. For the scenario decoder  $D$ , we modify our Generator to take in latent  
 355 representation  $\mathbf{z}$  with a dimension of 1024 instead of our own structured representation. Because  $D$   
 356 does not receive the number of agents as input, we modify Generator to produce the  $N = 32$  agents  
 357 for every input and additionally add an MLP decoder to predict the objectiveness score of each  
 358 output agent. Here objectiveness score is a binary probability score indicating whether we should  
 359 put each predicted agent onto the final scenario or not. During training, for computation of  $\mathcal{L}_{\text{rec}}$ , we  
 360 use Hungarian algorithm to pair ground-truth agents with the predicted ones. We then supervise the  
 361 objectiveness score in a similar way as in DETR.

362 Note that we need text-scenario paired data to train MotionCLIP. To this end, we use a rule-based  
 363 method to convert a real dataset  $\tau$  to a text  $L$ . This is done by describing different attributes of the  
 364 scenario with language. Similar to our Attribute Description dataset, in each text, we enumerate  
 365 the scenario properties 1) sparsity; 2) position; 3) speed and 4) ego vehicle’s motion. Here is one  
 366 example: "the scene is very dense; there exist cars on the front left of ego car; there is no car on the  
 367 back left of ego car; there is no car on the back right of ego car; there exist cars on the front right of  
 368 ego car; most cars are moving in fast speed; the ego car stops".

369 We transform every scenario in our dataset into a text with the format as above. We then train  
 370 MotionCLIP on our dataset with the same batch size and number of iterations as LCTGen.

## 371 C.2 Metric

372 We show how to compute MMD in this section. Specifically, MMD measures the distance between  
 373 two distributions  $q$  and  $p$ .

$$\begin{aligned} \text{MMD}^2(p, q) = & \mathbb{E}_{x, x' \sim p}[k(x, x')] + \mathbb{E}_{y, y' \sim q}[k(y, y')] \\ & - 2\mathbb{E}_{x \sim p, y \sim q}[k(x, y)], \end{aligned} \quad (9)$$

374 where  $k$  is the kernel function (a Gaussian kernel in this work). We use Gaussian kernel in this work.  
 375 For each pair of real and generated data  $(\tau, \hat{\tau})$ , we compute the distribution difference between them  
 376 per attribute.

### 377 C.3 Dataset

378 **Crash Report.** We use 38 cases from the CIREN dataset [5] from the NHTSA crash report search  
 379 engine. Each case contains a long text description of the scenario as well as a PDF diagram showing  
 380 the scenario. Because the texts are very long and require a long time for humans to comprehend,  
 381 in our human study, along with each text input, we will also show the diagram of the scenario as a  
 382 reference. We show example crash reports in Section D.3. We also refer the reader to the NHTSA  
 383 website<sup>2</sup> to view some examples of the crash report.

384 **Attribute Description.** We create text descriptions that highlight various attributes of a traffic  
 385 scenario. Specifically, we use the following attributes and values:

- 386 1. Sparsity: "the scenario is {nearly empty/sparse/with medium density/very dense}".
- 387 2. Position: "there are only vehicles on the {left/right/front/back} side(s) of the center car" or  
 388 "there are vehicles on different sides of the center car".
- 389 3. Speed: "most cars are moving in {slow/medium/fast} speed" or "most cars are stopping".
- 390 4. Ego-vehicle motion: "the center car {stops/moves straight/turns left/turns right}".

case\_0

This two-vehicle collision occurred at a crossover area in a two-way divided trafficway, on a weekday afternoon (daylight), during a rain shower, on a wet asphalt surface. The east/west roadway was straight with an uphill grade for the three westbound lanes, and a level grade for the three eastbound lanes. This trafficway intersected with a two-way, two-lane north/south roadway whose southbound lane was controlled by a stop sign. The posted speed limit for the east/west trafficway was 105 kmph (65 mph). Vehicle 1, 2001 Volkswagen Jetta four-door sedan, was being driven westbound (east to west) in the right lane approaching the crossover area. Vehicle 1 began to accelerate while attempting to cross over the westbound lanes. Vehicle 1 traveled across the left westbound lane and was struck in its right side by the front of Vehicle 2 (Event 1) as it entered the right westbound lane. After impact, Vehicle 1 was redirected northwest while rotating clockwise as it approached the roadside. Vehicle 1 came to rest on the right shoulder of the westbound lanes, facing southeast. After impact, Vehicle 2 spun-out while rotating clockwise and came to rest in the left northbound lane facing northeast. Vehicle 1 and 2 were towed due to damage sustained in the crash.

Crash report diagram (as reference)

(case\_0\_pair\_2)

(case\_0\_pair\_2) Which generated scenario above match the text description better?

Left

1

2

3

Right

(case\_0\_pair\_2) LEFT scenario matches the text description. \*

Strongly Disagree

1

2

3

4

5

Strongly Agree

(case\_0\_pair\_2) RIGHT scenario matches the text description. \*

Strongly Disagree

1

2

3

4

5

Strongly Agree

Figure A1: Human study user interface.

391 We create sentences describing each of the single attributes with all the possible values. We also  
 392 compose more complex sentences by combining 2,3 or 4 attributes together with random values for

<sup>2</sup><https://crashviewer.nhtsa.dot.gov/CIREN/Details?Study=CIREN&CaseId=11>



each of them. In total, we created 40 cases for human evaluation. Please refer to Section D.3 for some example input texts from this dataset.

#### C.4 Human study

We conduct the human study to access how well the generated scenario matches the input text. We showcase the user interface of our human study in Figure A1. We compose the output of two models with the same text input in random order and ask the human evaluator to judge which one matches the text description better. Then, we also ask them to give each output a 1-5 score. We allow the user to select "unsure" for the first question.

We invite 12 human evaluators for this study, and each of them evaluated all the 78 cases we provided. We ensure the human evaluators do not have prior knowledge of how different model works on these two datasets. On average, the human study takes about 80 minutes for each evaluator.

#### C.5 Qualitative result full texts

In Figure 4 of our main paper and Figure A2, we show 5 examples of the output of our model on Crash Report data on the first row. Recall that the texts we show in the figures are the summary from our Interpreter due to space limitations. We show the full input text for each example in this section.

Text 1: Full texts of examples in Figure 4 .

Figure 4 Column 1 (CIREN ID 594):  
"This crash occurred during daylight hours on a dry, bituminous divided trafficway (median strip without positive barrier) under clear skies. There were four east travel lanes (two through lanes, one left turn and one right turn) and four west travel lanes (two through lanes, one left and one right). The east lanes have a slight right curve and the west lanes curve slightly to the left. Both east/west travel lanes were level grade at point of impact and divided by a grass median. The speed limit at this location is 80km/h (50 mph). The intersecting north/south roadway consisted of one north travel lane and three south travel lanes (one through lanes, one left and one right). These travel lanes were divided by a raised concrete median on the northern side of the intersection. This intersection is controlled by overhead traffic signals. A 2017 Dodge Grand Caravan (V1) was traveling east in the left turn lane and a 2006 Nissan Sentra (V2) was traveling west in the left through lane. As V1 was traveling east it attempted to execute a left turn to travel north when its front bumper impacted the front bumper of V2 (Event 1). After initial impact, V1 rotated counterclockwise approximately 80 degrees before traveling to its final resting position in the middle of the intersection facing north. V2 was traveling west in the left through lane and attempting to travel through the intersection when its front bumper impacted the front bumper of V1. After initial impact V2 rotated clockwise approximately 20 degrees before traveling to its final resting position in the middle of the intersection facing northwest. V1 and V2 were towed from the scene due to damage sustained in the crash."

Figure 4 Column 2 (CIREN ID 31):  
"A 2016 Kia Sedona minivan (V1) was traveling southwest in the right lane of three. A 2015 Chevrolet Silverado cab chassis pickup (V2) was ahead of V1 in the right lane. V2 was a working vehicle picking up debris on the highway in a construction zone. The driver of V2 stopped his vehicle in the travel lane. The driver of V1 recognized an impending collision and applied the brakes while steering left in the last moment before impact. V1 slid approximately three meters before the front of V1 struck the back plane of V2 in a rear-end collision with full engagement across the striking planes (Event 1). Both vehicles came to rest approximately two meters from impact. V1 was towed due to damage while V2 continued in service."

Figure A2 Row 1 Column 1 (CIREN ID 77):  
"A 2017 Chevrolet Malibu LS sedan (V1) was traveling southeast in the right lane cresting a hill. A 1992 Chevrolet C1500 pickup (V2) was traveling northwest in the second lane cresting the same hill. Vehicle 2 crossed left across the center turn lane, an oncoming lane, and then into V1's oncoming lane of travel. Vehicle 1 and Vehicle 2 collided in a head-on, offset-frontal configuration (Event 1). Vehicle 1 attempted to steer left just before impact, focusing the damage to the middle-right of its front plane. Both vehicles rotated a few degrees clockwise before coming to rest in the roadway, where they were towed from the scene due to damage."

Figure A2 Row 1 Column 2 (CIREN ID 33):

"This two-vehicle collision occurred during the pre-dawn hours (dark, street lights present) of a fall weekday at the intersection of two urban roadways. The crash only involved the eastern leg of the intersection. The westbound lanes of the eastern leg consisted of four westbound lanes that included a right turn lane, two through lanes, and a left turn lane. The three eastbound lanes of the eastern leg consisted of a merge lane from the intersecting road and two through-lanes. The roadway was straight with a speed limit of 89 kmph (55 mph), and the intersection was controlled by overhead, standard electric, tri-colored traffic signals. At the time of the crash, the weather was clear and the roadway surfaces were dry. As Vehicle 1 approached the intersection, its driver did not notice the vehicles stopped ahead at the traffic light. The traffic signal turned green and Vehicle 2 began to slowly move forward. The frontal plane of Vehicle 1 struck the rear plane of Vehicle 2 (Event 1). Both vehicles came to rest in the left through-lane of the westbound lane facing in a westerly direction. Vehicle 1 was towed from the scene due to damage sustained in the crash. Vehicle 2 was not towed nor disabled. The driver of Vehicle 2 was transported by land to a local trauma center and was treated and released."

Figure A2 Row 1 Column 3 (CIREN ID 56):

"A 2013 Honda CR-V utility vehicle (V1) was traveling west in the right lane approaching an intersection. A 2003 Chevrolet Silverado 1500 pickup (V2) was stopped facing north at a stop sign. Vehicle 2 proceeded north across the intersection and was struck on the right plane by the front plane of V1 (Event 1). The impact caused both vehicles to travel off the northwest corner of the intersection, where they came to rest. Both vehicles were towed due to damage."

## D Additional Results

### D.1 Controllable Self-driving Policy Evaluation

We show how LCTGen can be utilized to generate interesting scenarios for controllable self-driving policy evaluation. Specifically, we leverage LCTGen to generate traffic scenario datasets possessing diverse properties, which we then use to assess self-driving policies under various situations. For this purpose, we input different text types into LCTGen: 1) Crash Report, the real-world crash report data from CIREN; 2) Traffic density specification, a text that describes the scenario as "sparse", "medium dense", or "very dense". For each type of text, we generate 500 traffic scenarios for testing. Additionally, we use 500 real-world scenarios from the Waymo Open dataset.

We import all these scenarios into an interactive driving simulation, MetaDrive [6]. We evaluate the performance of the IDM [7] policy and a PPO policy provided in MetaDrive. In each scenario, the self-driving policy replaces the ego-vehicle in the scenario and aims to reach the original end-point of the ego vehicle, while all other agents follow the trajectory set out in the original scenario. We show the success rate and collision rate of both policies in Table A1. Note that both policies experience significant challenges with the Crash Report scenarios, indicating that these scenarios present complex situations for driving policies. Furthermore, both policies exhibit decreased performance in denser traffic scenarios, which involve more intricate vehicle interactions. These observations give better insight about the drawbacks of each self-driving policy. This experiment showcases LCTGen as a valuable tool for generating traffic scenarios with varying high-level properties, enabling a more controlled evaluation of self-driving policies.

| Test Data                 | IDM [7]     |               | PPO (MetaDrive) [6] |               |
|---------------------------|-------------|---------------|---------------------|---------------|
|                           | Success (%) | Collision (%) | Success (%)         | Collision (%) |
| Real                      | 93.60       | 3.80          | 69.32               | 14.67         |
| LCTGen + Crash Report [5] | 52.35       | 39.89         | 25.78               | 27.98         |
| LCTGen + "Sparse"         | 91.03       | 8.21          | 41.03               | 21.06         |
| LCTGen + "Medium"         | 84.47       | 12.36         | 43.50               | 26.67         |
| LCTGen + "Dense"          | 68.12       | 19.26         | 38.89               | 32.41         |

Table A1: Controllable self-driving policy evaluation.

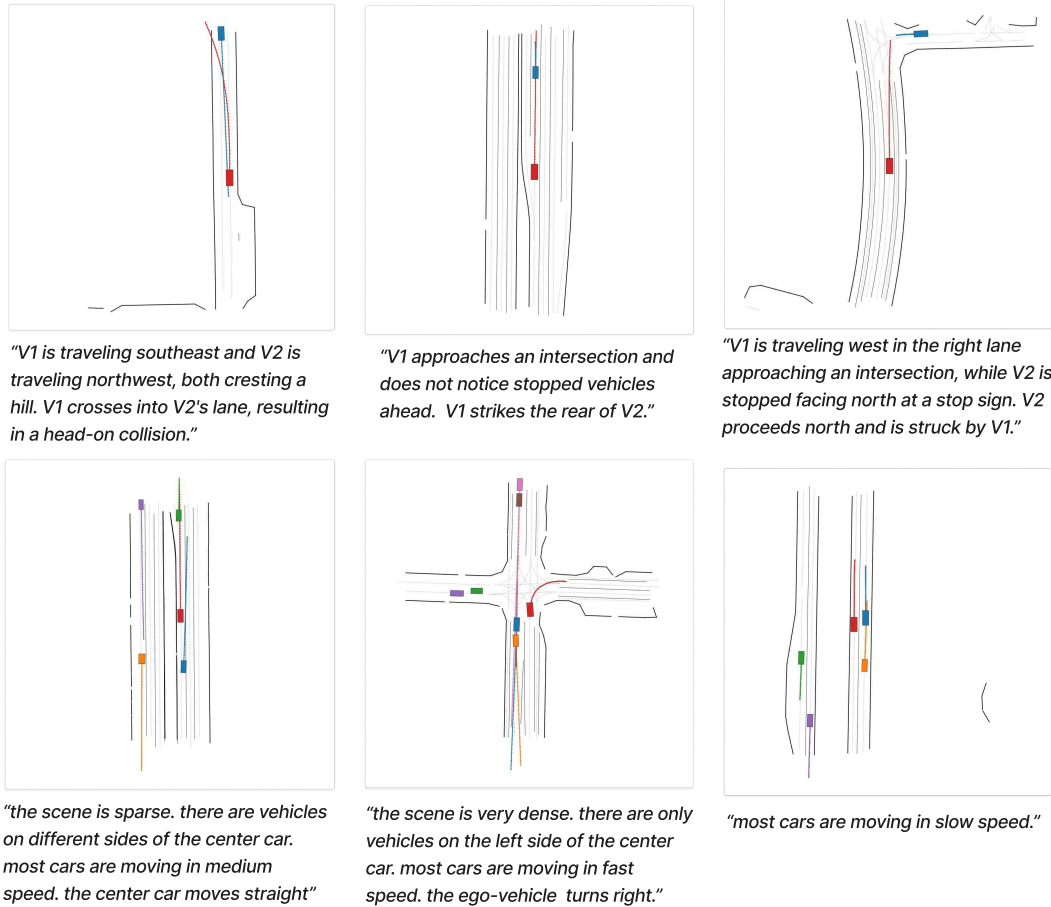

Figure A2: Qualitative results on text-conditioned generation.

## D.2 Text-conditioned Simulation Qualitative Results

We show the more qualitative results of text-conditioned simulation in Figure A2. Here, the upper 3 examples are from the Crash Report dataset, the lower 3 examples are from the Attribute Description dataset.

## D.3 Interpreter input-output examples

Here we show the full-text input and output of Interpreter for four examples in Figure 4. Specifically, we show two examples from Crash Report and two examples from Attribute Descriptions.

### Text 2: Input-output examples of Interpreter.

Figure 4 Column 1 (CIREN ID 594):

Input:

"This crash occurred during daylight hours on a dry, bituminous divided trafficway (median strip without positive barrier) under clear skies. There were four east travel lanes (two through lanes, one left turn and one right turn) and four west travel lanes (two through lanes, one left and one right). The east lanes have a slight right curve and the west lanes curve slightly to the left. Both east/west travel lanes were level grade at point of impact and divided by a grass median. The speed limit at this location is 80km/h (50 mph). The intersecting north/south roadway consisted of one north travel lane and three south travel lanes (one through lanes, one left and one right). These travel lanes were divided by a raised concrete median on the northern side of the intersection. This intersection is controlled by overhead traffic signals. A 2017 Dodge Grand Caravan (V1) was traveling east in the left turn lane and a 2006 Nissan Sentra (V2) was traveling west in the left through lane. As V1 was traveling

522 east it attempted to execute a left turn to travel north when its front bumper impacted  
 523 the front bumper of V2 (Event 1). After initial impact, V1 rotated counterclockwise  
 524 approximately 80 degrees before traveling to its final resting position in the middle  
 525 of the intersection facing north. V2 was traveling west in the left through lane and  
 526 attempting to travel through the intersection when its front bumper impacted the front  
 527 bumper of V1. After initial impact V2 rotated clockwise approximately 20 degrees  
 528 before traveling to its final resting position in the middle of the intersection facing  
 529 northwest. V1 and V2 were towed from the scene due to damage sustained in the crash."

530  
 531 **Output:**

532 **Summary:** V1 is traveling east in the left turn lane and attempts to turn left when it  
 533 collides with V2 traveling west in the left through lane. There are 2 vehicles in this  
 534 scenario. This happens at the intersection of an eight-lane divided trafficway and a  
 535 four-lane north/south roadway, controlled by traffic signals.

536 **Explanation:**

- 537 - V1 (ego vehicle) is traveling east in the left turn lane and attempts to turn left. We  
 538 cannot find V1's speed in the query. Because V1 tries to turn left, its initial speed  
 539 should be set low. We set V1's speed as 5 m/s, which has the index of 2. V1 turns left,  
 540 so its actions are all 1 (turn left).
- 541 - V2 is traveling west in the left through lane. As V1 is turning left, 5 seconds before the  
 542 crash, V2 is coming from the opposite direction (westbound), crossing the path of V1.  
 543 In the coordinates of V1 (which is facing east initially), V2 comes from the front and  
 544 is on the left side. Hence, V2's position is "\"front left\" (0). As V1 is facing east  
 545 and V2 facing west, V2 is moving in the parallel opposite direction with V1. Therefore  
 546 its direction is 1 (parallel\_opposite). We cannot find V2's speed in the query. Because  
 547 V2 is traveling west and hit by V1 5 seconds later, we assume V2's init speed is 8 m/s  
 548 (index 3). Given this speed, V2's distance to V1 is  $8\text{m/s} * 5\text{s} = 40\text{m}$  (index 8). V2  
 549 keeps going straight, so its actions are all 4 (keep speed).
- 550 - Map: This happens at the intersection of an eight-lane divided trafficway (4 lanes for  
 551 eastbound and westbound traffic) and a four-lane north/south roadway (1 lane for  
 552 northbound and 3 lanes for southbound traffic). The ego vehicle is in the left turn-  
 553 only lane with lane id 4. There is an intersection with a four-lane north/south road  
 554 ahead. V1 is about to cross the interaction, therefore the distance to the intersection  
 555 is with 15 meter index 3.

556 **Actor Vector:**

- 557 - 'V1': [-1, 0, 0, 2, 1, 1, 1, 1]
- 558 - 'V2': [0, 8, 1, 3, 4, 4, 4, 4]

559 **Map Vector:**

- 560 - 'Map': [4, 4, 1, 3, 3, 4]

561  
 562 **Figure A2 Row 1 Column 2 (CIREN ID 33):**

563 **Input:**

564 "This two-vehicle collision occurred during the pre-dawn hours (dark, street lights present)  
 565 of a fall weekday at the intersection of two urban roadways. The crash only involved  
 566 the eastern leg of the intersection. The westbound lanes of the eastern leg consisted  
 567 of four westbound lanes that included a right turn lane, two through lanes, and a left  
 568 turn lane. The three eastbound lanes of the eastern leg consisted of a merge lane from  
 569 the intersecting road and two through-lanes. The roadway was straight with a speed  
 570 limit of 89 kmph (55 mph), and the intersection was controlled by overhead, standard  
 571 electric, tri-colored traffic signals. At the time of the crash, the weather was clear  
 572 and the roadway surfaces were dry. As Vehicle 1 approached the intersection, its driver  
 573 did not notice the vehicles stopped ahead at the traffic light. The traffic signal  
 574 turned green and Vehicle 2 began to slowly move forward. The frontal plane of Vehicle 1  
 575 struck the rear plane of Vehicle 2 (Event 1). Both vehicles came to rest in the left  
 576 through-lane of the westbound lane facing in a westerly direction. Vehicle 1 was towed  
 577 from the scene due to damage sustained in the crash. Vehicle 2 was not towed nor  
 578 disabled. The driver of Vehicle 2 was transported by land to a local trauma center and  
 579 was treated and released."

580  
 581 **Output:**

582 **Summary:** V1 approaches an intersection and does not notice stopped vehicles ahead. The  
 583 traffic light turns green, and V2 starts moving forward slowly. V1 strikes the rear of  
 584 V2. There are 2 vehicles in this scenario. This happens at the intersection of two  
 585 urban roadways with multiple lanes and traffic signals.

586 **Explanation:**

- 587 - V1 (ego vehicle) is approaching the intersection and does not notice the stopped vehicles  
 588 ahead. We cannot find V1's speed in the query. Because V1 is moving and does not stop,  
 589 we assume V1's initial speed is 10 m/s (index 4). V1 keeps going straight, so its  
 590 actions are all 4 (keep speed).
- 591 - V2 is stopped at the traffic light and starts moving forward slowly when the light turns  
 592 green. As V1 is moving straight and hits V2 from behind, 5 seconds before the crash, V2  
 593 is in front of V1. Hence, V2's position is "\"front right\" (3). As V1 and V2 are both

594 moving westbound, V2 is moving in the parallel same direction with V1. Therefore its  
 595 direction is 0 (parallel\_same). V2's speed is slow, so we set it to 2.5 m/s (index 1).  
 596 Given this speed, V2's distance to V1 is  $10\text{m/s} * 5\text{s} - 2.5\text{m/s} * 5\text{s} = 37.5\text{m}$  (index 7). V2  
 597 keeps going straight, so its actions are all 4 (keep speed).  
 598 - Map: This happens at the intersection of two urban roadways with multiple lanes and  
 599 traffic signals. The ego vehicle is in the left through-lane of the westbound lane with  
 600 lane id 3. There are 4 westbound lanes and 3 eastbound lanes. The distance of the ego  
 601 vehicle to the intersection is set to be  $10\text{m/s} * 5\text{s} = 50\text{m}$  (index 10).  
 602 Actor Vector:  
 603 - 'V1': [-1, 0, 0, 4, 4, 4, 4, 4]  
 604 - 'V2': [3, 7, 0, 1, 4, 4, 4, 4]  
 605 Map Vector:  
 606 - 'Map': [4, 3, 0, 0, 10, 3]  
 607  
 608  
 609 Figure A2 Row 2 Column 1:  
 610 Input:  
 611 "the scene is with sparse density. there are vehicles on different sides of the center car.  
 612 most cars are moving in medium speed. the center car moves straight"  
 613  
 614 Output:  
 615 Summary: The ego vehicle (V1) moves straight at a medium speed in a sparse traffic scenario.  
 616 There are vehicles on different sides of the ego vehicle, corresponding to the sparse  
 617 density. We generate 4 vehicles in the scene on a six-lane two-way road. The ego car is  
 618 placed on the third lane from the right.  
 619 Explanation:  
 620 - V1 (ego vehicle) is in the center and moves straight. Because V1 moves with a medium speed  
 621 , its speed is set to 4 (medium speed) and action indices are 4 (keep speed).  
 622 - V2 is in the closest distance range (index 0). It is moving in the same direction as the  
 623 ego vehicle (index 0) and is located in the back right (index 2) of the ego vehicle. It  
 624 is moving with a medium speed (index 4), and its actions are all to keep speed (index  
 625 4).  
 626 - V3 is in a further distance range (index 1). It is moving in the opposite direction of the  
 627 ego vehicle (index 1), therefore it is on the left side of the ego vehicle, locating  
 628 in the back left (index 1) of the ego vehicle. It is moving with a medium speed (index  
 629 4), and its actions are all to keep speed (index 4).  
 630 - V4 is in the farthest distance range (index 2). It is moving in the same direction as the  
 631 ego vehicle (index 0) and is located in the front right (index 3) of the ego vehicle.  
 632 It is moving with a medium speed (index 4), and its actions are all to keep speed (  
 633 index 4).  
 634 - V5 is in the farthest distance range (index 2). It is moving in the opposite direction of  
 635 the ego vehicle (index 1), therefore it is on the left side of the ego vehicle,  
 636 locating in the front left (index 0) of the ego vehicle. It is moving with a medium  
 637 speed (index 4), and its actions are all to keep speed (index 4).  
 638 - Map: Given the sparse density and the presence of vehicles on different sides of the ego  
 639 vehicle, we assume this happens on a 6-lane two-way road. The ego vehicle is in the  
 640 third lane from the right, with lane id 3. There is no intersection nearby, indicated  
 641 by -1.  
 642 Actor Vector:  
 643 - 'V1': [-1, 0, 0, 4, 4, 4, 4, 4]  
 644 - 'V2': [2, 0, 0, 4, 4, 4, 4, 4]  
 645 - 'V3': [1, 1, 1, 4, 4, 4, 4, 4]  
 646 - 'V4': [3, 2, 0, 4, 4, 4, 4, 4]  
 647 - 'V5': [0, 2, 1, 4, 4, 4, 4, 4]  
 648 Map Vector:  
 649 - 'Map': [3, 3, 0, 0, -1, 3]  
 650  
 651 Figure 4 Column 3:  
 652 Input:  
 653 "the scene is with sparse density. there are only vehicles on the back side of the center  
 654 car. most cars are moving in fast speed. the center car turns left"  
 655  
 656 Output:  
 657  
 658 Summary: The ego vehicle (V1) turns left at a fast speed in a sparse traffic scenario. All  
 659 other vehicles are located behind the ego vehicle, which corresponds to the scenario's  
 660 sparse density. We generate 3 vehicles in the scene on a six-lane two-way road with an  
 661 intersection in front. The ego car is placed on the left-turn lane.  
 662 Explanation:  
 663 - V1 (ego vehicle) is in the center and turns left. Because V1 moves with a fast speed, its  
 664 speed is set to 6 (fast speed) and action indices are 1 (turn left).

665 - V2-V3 are in the closest distance range (index 0). They are moving in the same direction  
666 as the ego vehicle (index 0). Because the ego car is on the left-turn lane, they are  
667 both located in the back right (index 2) of the ego vehicle. They are both moving with  
668 a fast speed (index 6 or 7), and their actions are all to keep speed (index 4).  
669 - V4 is in a further distance range (index 1). It is moving in the opposite direction of the  
670 ego vehicle (index 1), therefore it is on the left side of the ego vehicle, locating  
671 in the back left (index 1) of the ego vehicle. It is moving with a fast speed (index 6)  
672 , in the opposite direction as the ego vehicle (index 1). Its actions are all to keep  
673 speed (index 4).  
674 - Map: Given the sparse density and the presence of vehicles behind the ego vehicle, we  
675 assume this happens on a 6-lane two-way road. The ego vehicle is in the left-turn lane,  
676 with lane id 3. There is an intersection 10 meters ahead (index 2) as the ego vehicle  
677 is turning left.  
678 Actor Vector:  
679 - 'V1': [-1, 0, 0, 6, 1, 1, 1, 1]  
680 - 'V2': [2, 0, 0, 6, 4, 4, 4, 4]  
681 - 'V3': [2, 0, 0, 7, 4, 4, 4, 4]  
682 - 'V4': [1, 1, 1, 6, 4, 4, 4, 4]  
683 Map Vector:  
684 - 'Map': [3, 3, 2, 2, 2, 3]

#### 686 D.4 Attribute Description result split

| Method         | Density     | Position    | Speed       | Ego-car Motion |
|----------------|-------------|-------------|-------------|----------------|
| TrafficGen [3] | 2.75        | 2.03        | 2.34        | 2.27           |
| MotionCLIP [4] | 1.89        | 2.24        | 1.91        | 1.78           |
| LCTGen         | <b>4.24</b> | <b>4.28</b> | <b>4.38</b> | <b>4.40</b>    |

Table A2: Human study result split analysis on Attribute Description scores.

687 We generate the Attribute Description dataset with different attributes. In this section, we split the  
688 matching score result for the full dataset into different attributes. We show the result in Table A2.  
689 We observe our method has nearly identical performance over all the attributes. TrafficGen the best  
690 results with Density, while MotionCLIP performs the best with Position.

#### 691 D.5 Ablation study

| Method     | Initialization |              |              |              | Motion       |              |              |
|------------|----------------|--------------|--------------|--------------|--------------|--------------|--------------|
|            | Pos            | Heading      | Speed        | Size         | mADE         | mFDE         | SCR          |
| w/o Quad.  | 0.092          | 0.122        | 0.076        | 0.124        | 2.400        | 4.927        | 8.087        |
| w/o Dist.  | 0.071          | 0.124        | 0.073        | 0.121        | 1.433        | 3.041        | 6.362        |
| w/o Ori.   | 0.067          | 0.132        | 0.082        | 0.122        | 1.630        | 3.446        | 7.300        |
| w/o Speed  | 0.063          | 0.120        | 0.104        | 0.122        | 2.611        | 5.188        | 7.150        |
| w/o Action | 0.067          | 0.128        | 0.173        | 0.128        | 2.188        | 5.099        | 7.146        |
| w/o $x_i$  | 0.067          | 0.133        | 0.076        | 0.124        | 1.864        | 3.908        | <b>5.929</b> |
| w/o GMM    | 0.064          | 0.128        | 0.078        | 0.178        | 1.606        | 3.452        | 8.216        |
| LCTGen     | <b>0.062</b>   | <b>0.115</b> | <b>0.072</b> | <b>0.120</b> | <b>1.329</b> | <b>2.838</b> | 6.700        |

Table A3: Ablation study of LCTGen

692 In our main paper, we split the ablation study into two different groups. Here we show the full results  
693 of all the ablated methods in Table A3. We additionally show the effect of 1) using the learnable  
694 query  $x_i$  and 2) using the GMM prediction for attributes.

#### 695 D.6 Instructional Traffic Scenario Editing

696 We show another example of instructional traffic scenario editing in Figure A3. Different from  
697 the compound editing in Figure 5 in the main paper, here every example is edited from the input  
698 scenario.

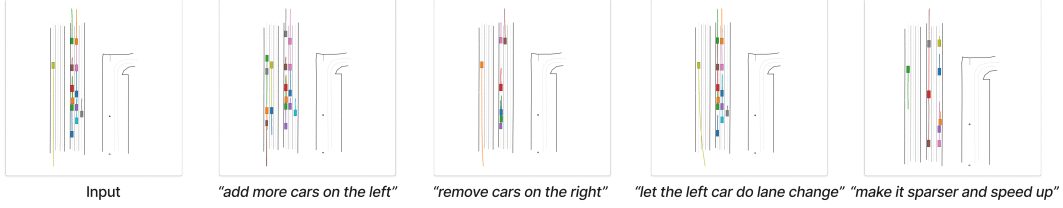

Figure A3: Instructional editing on a real-world scenario

## References

- [1] J. Wei, X. Wang, D. Schuurmans, M. Bosma, E. Chi, Q. Le, and D. Zhou. Chain of thought prompting elicits reasoning in large language models. *arXiv preprint arXiv:2201.11903*, 2022.
- [2] B. Varadarajan, A. Hefny, A. Srivastava, K. S. Refaat, N. Nayakanti, A. Cornman, K. Chen, B. Douillard, C. P. Lam, D. Anguelov, and B. Sapp. Multipath++: Efficient information fusion and trajectory aggregation for behavior prediction, 2021.
- [3] L. Feng, Q. Li, Z. Peng, S. Tan, and B. Zhou. Trafficgen: Learning to generate diverse and realistic traffic scenarios. *arXiv preprint arXiv:2210.06609*, 2022.
- [4] G. Tevet, B. Gordon, A. Hertz, A. H. Bermano, and D. Cohen-Or. Motionclip: Exposing human motion generation to clip space. In *Computer Vision—ECCV 2022: 17th European Conference, Tel Aviv, Israel, October 23–27, 2022, Proceedings, Part XXII*, pages 358–374. Springer, 2022.
- [5] N. H. T. S. Administration. Crash injury research engineering network (ciren). <https://crashviewer.nhtsa.dot.gov/CIREN/SearchIndex>, 2016.
- [6] Q. Li, Z. Peng, L. Feng, Q. Zhang, Z. Xue, and B. Zhou. Metadrive: Composing diverse driving scenarios for generalizable reinforcement learning. *IEEE Transactions on Pattern Analysis and Machine Intelligence*, 2022.
- [7] M. Treiber, A. Hennecke, and D. Helbing. Congested traffic states in empirical observations and microscopic simulations. *Physical Review E*, 62(2):1805–1824, aug 2000. doi:10.1103/physreve.62.1805. URL <https://doi.org/10.1103%2Fphysreve.62.1805>.
